# Supplementary material for: Transcriptional activator DOT1L putatively regulates human embryonic stem cell differentiation into the cardiac lineage
Source: PubMed Central journal article supplement (PMC5891944; doi:10.1186/s13287-018-0810-8), 2018-04-10
Supplement: 13287_2018_810_MOESM2_ESM.pdf [file 13287_2018_810_MOESM2_ESM.pdf]

## Additional File 2

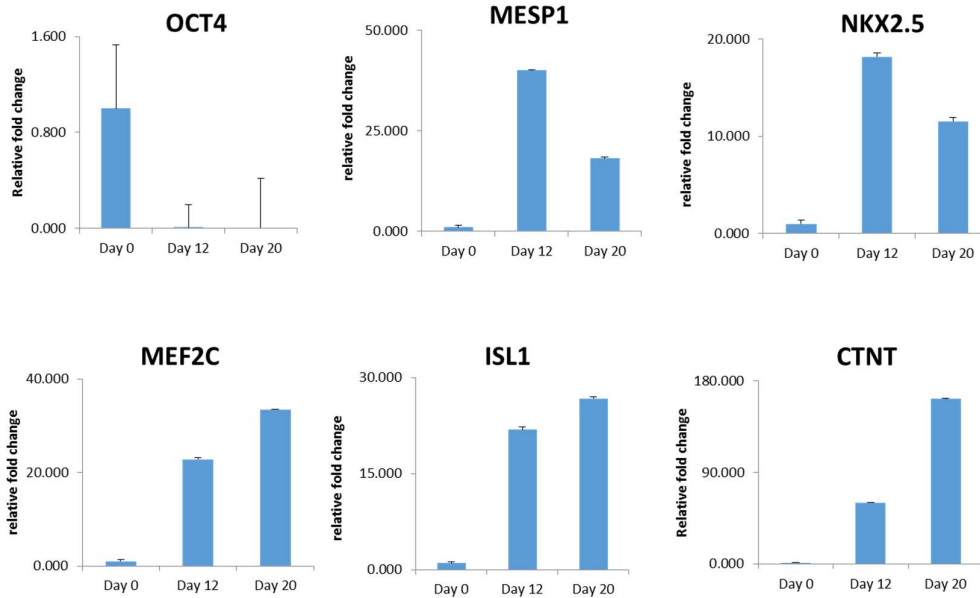

**Characterization of cardiac differentiation of HES3 cells by quantitative real-time PCR (qRT-PCR).** Expression of transcripts representing pluripotency (OCT4), cardiac mesoderm (MESP1), cardiac progenitors (NKX2.5, MEF2C) and cardiomyocytes (CTNT) at days 0, 12 and 20 during 20 days cardiac differentiation. Note OCT-4 expression in undifferentiated cells which is down-regulated as the cells initiate differentiation. Early cardiac markers are detected on Day 12 and mature markers are up-regulated on Day 20. Similar changes in transcripts expression was observed when KIND1 cells were differentiated into cardiac cells as described earlier (Pursani et al, 2017). Error bars represent  $\pm$  SEM.
